# Supplementary material for: A Wristwatch-Based Wireless Sensor Platform for IoT Health Monitoring Applications
Source: MDPI journal article supplement (doi:10.3390/s20061675), 2020-03-17
Supplement: s1 [file s1]

## Supplementary Materials:

# A Wristwatch-Based Wireless Sensor Platform for IoT Health Monitoring Applications

Sanjeev Kumar<sup>1</sup>, John L. Buckley<sup>1</sup>, John Barton<sup>1</sup>, Melusine Pigeon<sup>1</sup>, Robert Newberry<sup>2</sup>, Matthew Rodencal<sup>2</sup>, Adhurim Hajzeraj<sup>1</sup>, Tim Hannon<sup>2</sup>, Ken Rogers<sup>1</sup>, Declan Casey<sup>1</sup>, Donal O'Sullivan<sup>1</sup>, Brendan O'Flynn<sup>1</sup>

<sup>1</sup> Tyndall National Institute, University College Cork, Dyke Parade, T12R5CP, Cork, Ireland

<sup>2</sup> Sanmina Corporation, 13000 S. Memorial Parkway, Huntsville, AL 35803, USA

\* Correspondence: sanjeev.kumar@tyndall.ie; Tel.: +353-212-346-109

**Supplementary Figure 1**

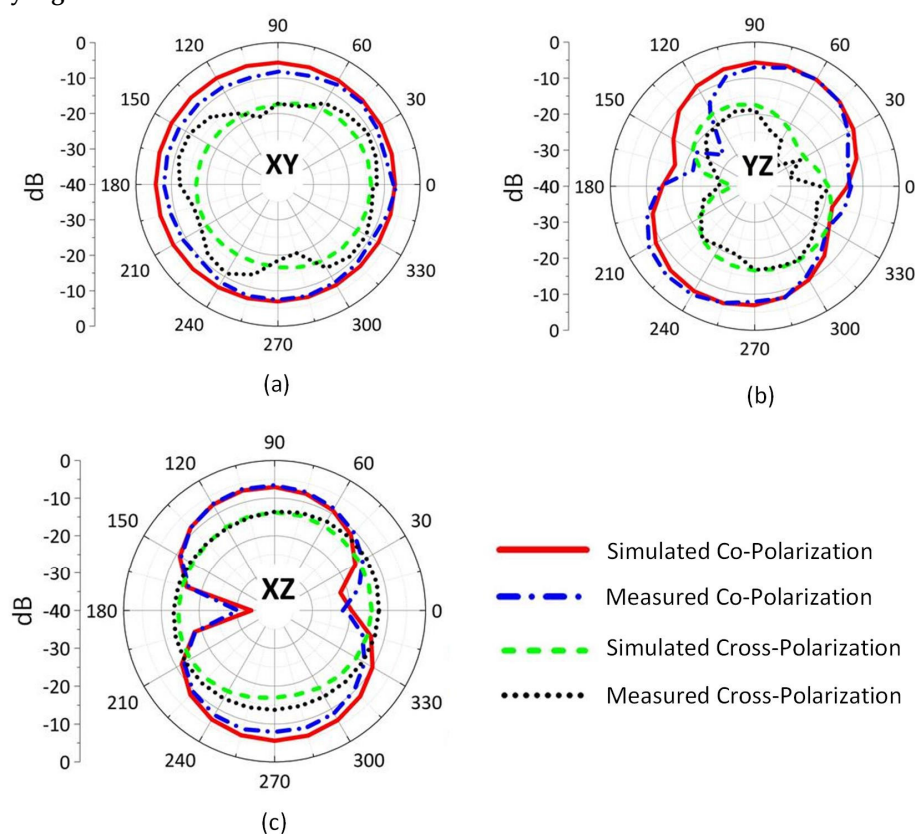

**Figure 1.** Simulated and measured 2D radiation characteristics of a reference antenna at 915 MHz (a)  $xy$ -plane, (b)  $yz$ -plane, and (c)  $xz$ -plane.

Supplementary Figure 2

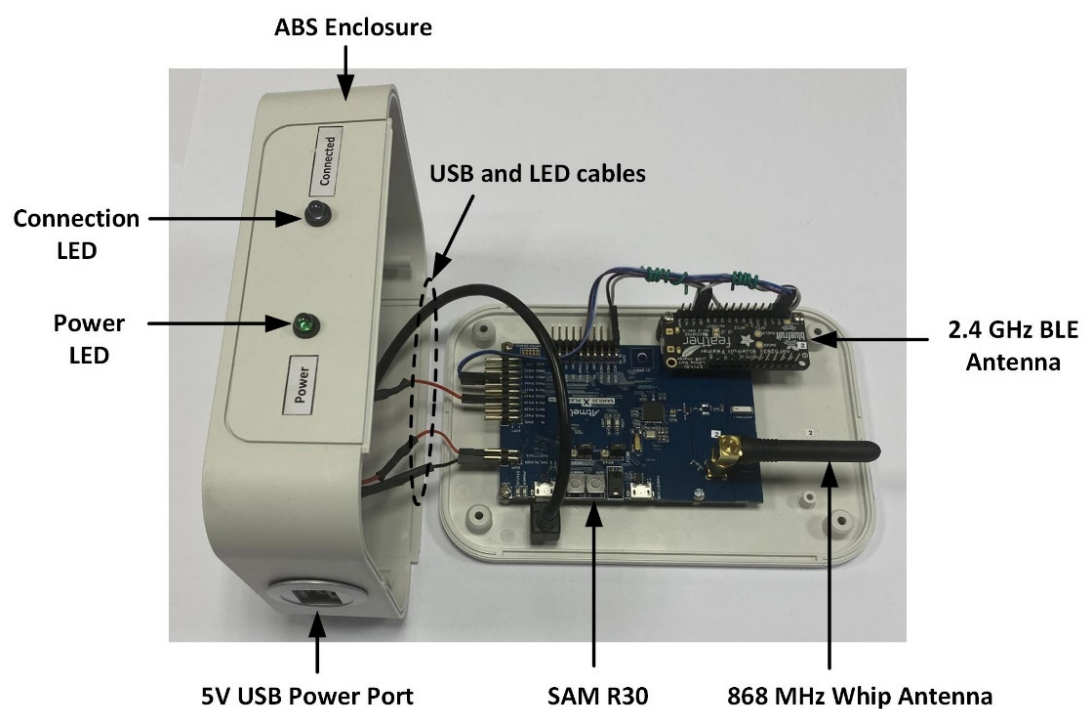

Figure 2. Internal components of the gateway.

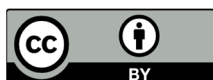

© 2020 by the authors. Licensee MDPI, Basel, Switzerland. This article is an open access article distributed under the terms and conditions of the Creative Commons Attribution (CC BY) license (<http://creativecommons.org/licenses/by/4.0/>).
